# Supplementary material
Source: PubMed Central journal article supplement (PMC10940016)
Supplement: mmc1.pdf [file mmc1.pdf]

**The American Journal of Human Genetics, Volume 111**

**Supplemental information**

**Transcriptome-wide association study of the plasma  
proteome reveals *cis* and *trans* regulatory  
mechanisms underlying complex traits**

**Henry Wittich, Kristin Ardlie, Kent D. Taylor, Peter Durda, Yongmei Liu, Anna  
Mikhaylova, Chris R. Gignoux, Michael H. Cho, Stephen S. Rich, Jerome I.  
Rotter, NHLBI TOPMed Consortium, Ani Manichaikul, Hae Kyung Im, and Heather E.  
Wheeler**

## Supplemental Figures

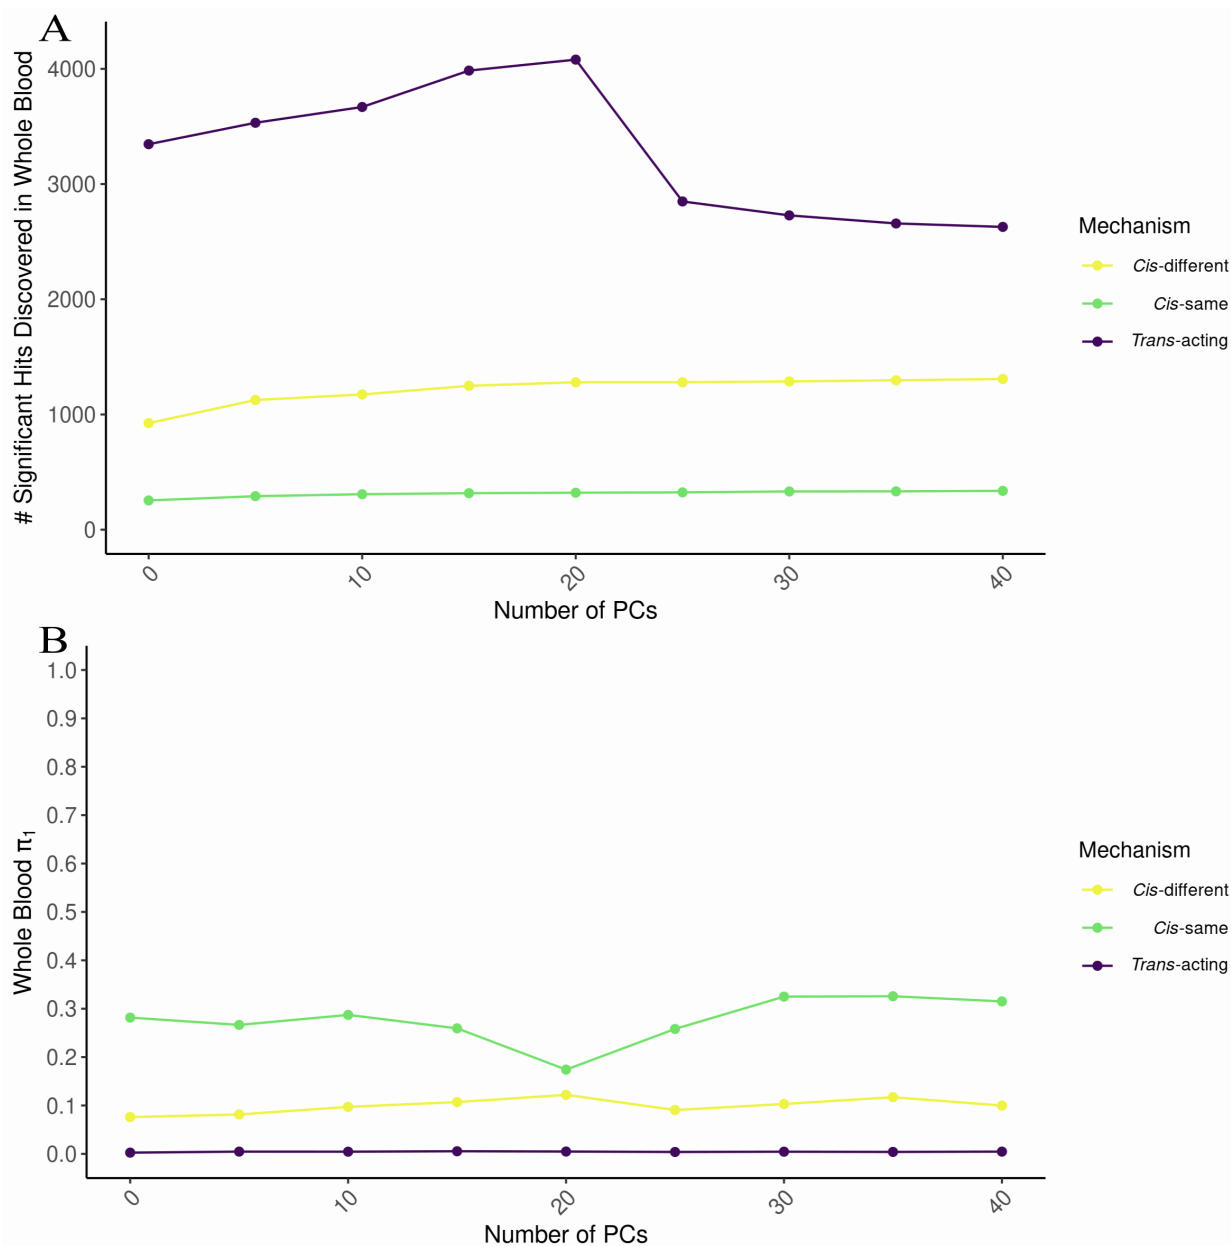

**Figure S1. TWAS results in INTERVAL using GTEx whole blood transcriptome models across protein principal components (PCs).** (A) Counts of transcript-protein pairs that associate in each mechanism category with  $FDR < 0.05$ . The protein matrix was adjusted for 0-40 PCs in 5 PC increments, taking the residuals as the adjusted protein levels in the association tests. (B) Expected true positive rates ( $\pi_1$ ) across protein PCs.

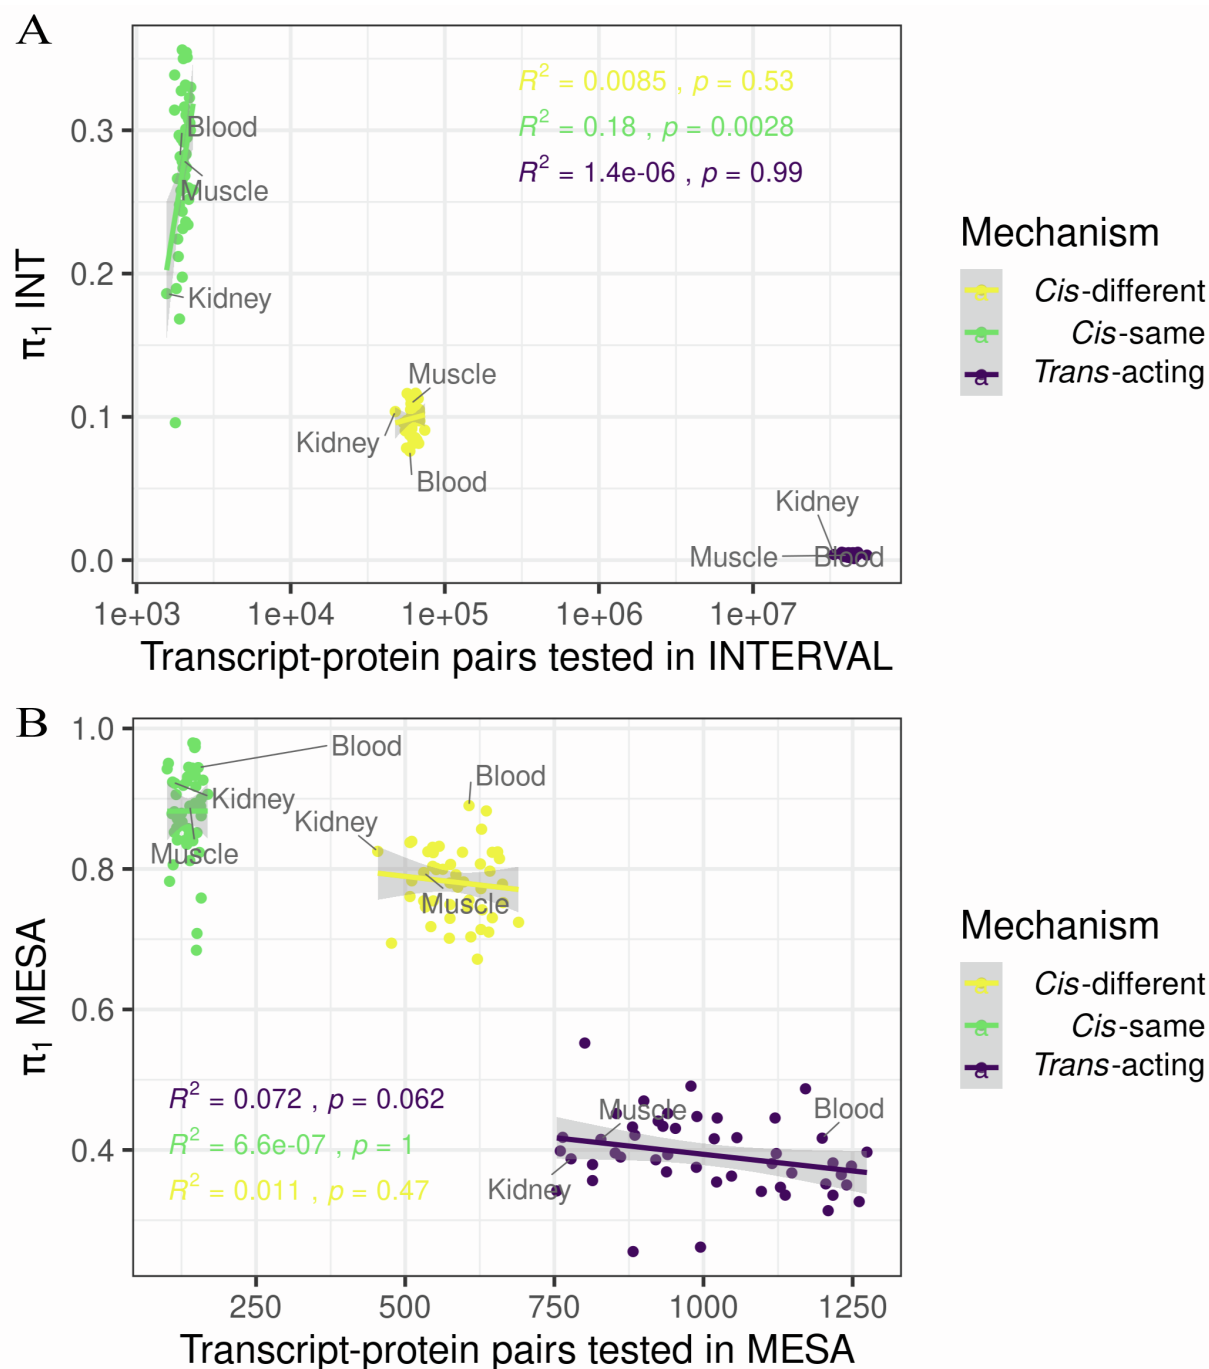

**Figure S2. Comparison of  $\pi_1$  expected true positive rates to the number of predicted transcript-protein pairs tested in each GTEx tissue transcriptome prediction model. (A)** Linear regression results in INTERVAL colored by each mechanism class. **(B)** Linear regression results in MESA colored by each mechanism class. Note only transcript-protein pairs with  $\text{FDR} < 0.05$  in INTERVAL were tested in TOPMed MESA. Tissues with the most samples in GTEx (Muscle – Skeletal,  $n=706$  and Whole Blood,  $n=670$ ) and the least samples in GTEx (Kidney – Cortex,  $n=73$ ) are labeled.

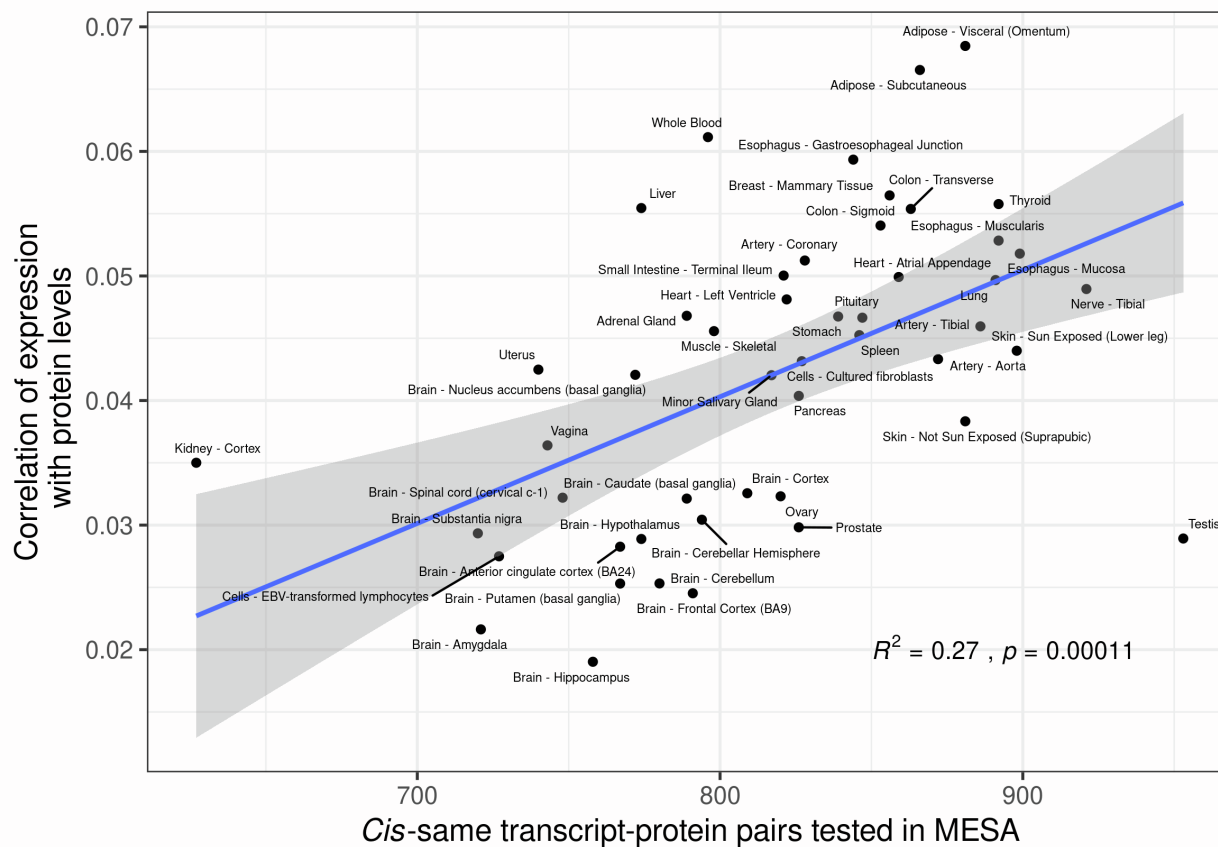

**Figure S3. Comparison of median Pearson correlation between predicted expression and protein levels with the number of cis-same transcript-protein pairs tested.** Points are labeled by GTEx transcriptome prediction model tissue. The blue line is the linear regression line and 95% confidence interval in gray.

## Supplemental Tables

Table S1. Number of genes in the transcriptome prediction model per tissue.

| Tissue                                | # of Genes | Tissue                          | # of Genes |
|---------------------------------------|------------|---------------------------------|------------|
| Adipose Subcutaneous                  | 14,732     | Esophagus Mucosa                | 14,589     |
| Adipose Visceral Omentum              | 14,640     | Esophagus Mucularis             | 14,603     |
| Adrenal Gland                         | 13,622     | Heart Atrial Appendage          | 14,035     |
| Artery Aorta                          | 14,396     | Heart Left Ventricle            | 13,200     |
| Artery Coronary                       | 13,878     | Kidney Cortex                   | 11,164     |
| Artery Tibial                         | 14,493     | Liver                           | 12,714     |
| Brain Amygdala                        | 12,814     | Lung                            | 15,058     |
| Brain Anterior Cingulate Cortex BA24  | 13,528     | Minor Salivary Gland            | 13,884     |
| Brain Caudate Basal Ganglia           | 14,118     | Muscle Skeletal                 | 13,381     |
| Brain Cerebellar Hemisphere           | 13,771     | Nerve Tibial                    | 15,373     |
| Brain Cerebellum                      | 13,992     | Ovary                           | 13,738     |
| Brain Cortex                          | 14,284     | Pancreas                        | 13,695     |
| Brain Frontal Cortex BA9              | 14,091     | Pituitary                       | 14,647     |
| Brain Hippocampus                     | 13,526     | Prostate                        | 14,450     |
| Brain Hypothalamus                    | 13,741     | Skin Not Sun Exposed Subrapubic | 14,932     |
| Brain Nucleus Accumbens Basal Ganglia | 14,062     | Skin Sun Exposed Lower Leg      | 15,204     |
| Brain Putamen Basal Ganglia           | 13,694     | Small Intestine Terminal Ileum  | 14,065     |
| Brain Spinal Cord Cervical C-1        | 13,096     | Spleen                          | 14,073     |
| Brain Substantia Nigra                | 12,637     | Stomach                         | 14,102     |
| Breast Mammary Tissue                 | 14,654     | Testis                          | 17,867     |
| Cells Cultered Fibroblasts            | 13,976     | Thyroid                         | 15,308     |
| Cells EBV-Transformed Lymphocytes     | 12,398     | Uterus                          | 13,199     |
| Colon Sigmoid                         | 14,363     | Vagina                          | 12,969     |
| Colon Transverse                      | 14,582     | Whole Blood                     | 12,623     |
| Esophagus Gastroesophageal Junction   | 14,285     |                                 |            |

**Table S2. Genes with either predicted or observed expression and protein measurements for every tissue.**

| Tissue                                | Genes Tested | Tissue                            | Genes Tested |
|---------------------------------------|--------------|-----------------------------------|--------------|
| Adipose Subcutaneous                  | 866          | Esophagus Mucularis               | 892          |
| Adipose Visceral Omentum              | 881          | Heart Atrial Appendage            | 859          |
| Adrenal Gland                         | 789          | Heart Left Ventricle              | 822          |
| Artery Aorta                          | 872          | Kidney Cortex                     | 627          |
| Artery Coronary                       | 828          | Liver                             | 774          |
| Artery Tibial                         | 886          | Lung                              | 891          |
| Brain Amygdala                        | 721          | Minor Salivary Gland              | 817          |
| Brain Anterior Cingulate Cortex BA24  | 767          | Muscle Skeletal                   | 798          |
| Brain Caudate Basal Ganglia           | 789          | Nerve Tibial                      | 921          |
| Brain Cerebellar Hemisphere           | 794          | Ovary                             | 820          |
| Brain Cerebellum                      | 780          | Pancreas                          | 826          |
| Brain Cortex                          | 809          | Pituitary                         | 847          |
| Brain Frontal Cortex BA9              | 791          | Prostate                          | 826          |
| Brain Hippocampus                     | 758          | Skin Not Sun Exposed Subrapubic   | 881          |
| Brain Hypothalamus                    | 774          | Skin Sun Exposed Lower Leg        | 898          |
| Brain Nucleus Accumbens Basal Ganglia | 772          | Small Intestine Terminal Ileum    | 821          |
| Brain Putamen Basal Ganglia           | 767          | Spleen                            | 846          |
| Brain Spinal Cord Cervical C-1        | 748          | Stomach                           | 839          |
| Brain Substantia Nigra                | 720          | Testis                            | 953          |
| Breast Mammary Tissue                 | 856          | Thyroid                           | 892          |
| Cells Cultered Fibroblasts            | 827          | Uterus                            | 740          |
| Cells EBV-Transformed Lymphocytes     | 727          | Vagina                            | 743          |
| Colon Sigmoid                         | 853          | Whole Blood                       | 796          |
| Colon Transverse                      | 863          | Monocytes – observed <sup>a</sup> | 862          |
| Esophagus Gastroesophageal Junction   | 844          | PBMC – observed <sup>a</sup>      | 862          |
| Esophagus Mucosa                      | 899          | T-cells – observed <sup>a</sup>   | 862          |

<sup>a</sup>Observed expression tissues are marked, the rest are predicted expression levels.

**Table S3. INTERVAL TWAS for protein results for every tissue.**  $\pi_1$  is the expected true positive rate and the number of transcript-protein pairs tested is indicated for each mechanism class.

| Tissue                                | <i>Trans-acting</i><br>$\pi_1$ | <i>Pairs tested</i> | <i>Cis-acting</i><br>$\pi_1$ | <i>Pairs tested</i> | <i>Cis-different</i><br>$\pi_1$ | <i>Pairs tested</i> | <i>Cis-same</i> $\pi_1$ | <i>Pairs tested</i> |
|---------------------------------------|--------------------------------|---------------------|------------------------------|---------------------|---------------------------------|---------------------|-------------------------|---------------------|
| Adipose Subcutaneous                  | 0.0047                         | 45519311            | 0.0905                       | 68056               | 0.0839                          | 65927               | 0.2950                  | 2129                |
| Adipose Visceral Omentum              | 0.0038                         | 45112261            | 0.1214                       | 67748               | 0.1154                          | 65655               | 0.3107                  | 2093                |
| Adrenal Gland                         | 0.0052                         | 41622061            | 0.1056                       | 62015               | 0.0995                          | 60067               | 0.2943                  | 1948                |
| Artery Aorta                          | 0.0052                         | 44459436            | 0.1092                       | 66129               | 0.1012                          | 64000               | 0.3510                  | 2129                |
| Artery Coronary                       | 0.0041                         | 42425522            | 0.1185                       | 63253               | 0.1133                          | 61242               | 0.2743                  | 2011                |
| Artery Tibial                         | 0.0040                         | 45006116            | 0.1029                       | 67045               | 0.0985                          | 64890               | 0.2341                  | 2155                |
| Brain Amygdala                        | 0.0043                         | 38985756            | 0.0905                       | 57171               | 0.0903                          | 55386               | 0.0959                  | 1785                |
| Brain Anterior Cingulate Cortex BA24  | 0.0020                         | 41159402            | 0.0977                       | 60553               | 0.0954                          | 58653               | 0.1683                  | 1900                |
| Brain Caudate Basal Ganglia           | 0.0015                         | 43159564            | 0.1122                       | 63791               | 0.1075                          | 61796               | 0.2598                  | 1995                |
| Brain Cerebellar Hemisphere           | 0.0030                         | 42161917            | 0.0953                       | 63077               | 0.0920                          | 61097               | 0.1975                  | 1980                |
| Brain Cerebellum                      | 0.0033                         | 42799470            | 0.1012                       | 63273               | 0.0967                          | 61296               | 0.2435                  | 1977                |
| Brain Cortex                          | 0.0023                         | 43762809            | 0.1091                       | 64905               | 0.1030                          | 62865               | 0.2958                  | 2040                |
| Brain Frontal Cortex BA9              | 0.0027                         | 43036320            | 0.1023                       | 63492               | 0.0970                          | 61517               | 0.2653                  | 1975                |
| Brain Hippocampus                     | 0.0036                         | 41085591            | 0.0986                       | 60906               | 0.0923                          | 59018               | 0.2965                  | 1888                |
| Brain Hypothalamus                    | 0.0026                         | 41705870            | 0.1177                       | 61681               | 0.1135                          | 59784               | 0.2479                  | 1897                |
| Brain Nucleus Accumbens Basal Ganglia | 0.0035                         | 42906136            | 0.0906                       | 63455               | 0.0853                          | 61514               | 0.2580                  | 1941                |
| Brain Putamen Basal Ganglia           | 0.0036                         | 41939367            | 0.1120                       | 61914               | 0.1050                          | 59964               | 0.3276                  | 1950                |
| Brain Spinal Cord Cervical C-1        | 0.0047                         | 39565605            | 0.0825                       | 58308               | 0.0782                          | 56443               | 0.2119                  | 1865                |
| Brain Substantia Nigra                | 0.0032                         | 38209132            | 0.1034                       | 55808               | 0.0958                          | 54041               | 0.3386                  | 1767                |
| Breast Mammary Tissue                 | 0.0050                         | 44906127            | 0.1239                       | 66864               | 0.1165                          | 64758               | 0.3543                  | 2106                |
| Cells Cultered Fibroblasts            | 0.0049                         | 43559973            | 0.0872                       | 64062               | 0.0812                          | 62005               | 0.2683                  | 2057                |
| Cells EBV-Transformed Lymphocytes     | 0.0055                         | 37649767            | 0.1021                       | 57560               | 0.0954                          | 55796               | 0.3141                  | 1764                |
| Colon Sigmoid                         | 0.0035                         | 44292598            | 0.1106                       | 66017               | 0.1052                          | 63910               | 0.2739                  | 2107                |
| Colon Transverse                      | 0.0044                         | 44792441            | 0.1154                       | 66774               | 0.1115                          | 64690               | 0.2361                  | 2084                |

|                                           |        |          |        |       |        |       |        |      |
|-------------------------------------------|--------|----------|--------|-------|--------|-------|--------|------|
| Esophagus<br>Gastroesophageal<br>Junction | 0.0034 | 43875442 | 0.1134 | 65798 | 0.1072 | 63714 | 0.3008 | 2084 |
| Esophagus Mucosa                          | 0.0034 | 45175253 | 0.1093 | 68197 | 0.1046 | 66016 | 0.2518 | 2181 |
| Esophagus<br>Mucularis                    | 0.0011 | 45189402 | 0.1100 | 67404 | 0.1034 | 65233 | 0.3076 | 2171 |
| Heart Atrial<br>Appendage                 | 0.0035 | 43208691 | 0.1127 | 64749 | 0.1054 | 62675 | 0.3316 | 2074 |
| Heart Left<br>Ventricle                   | 0.0026 | 40714721 | 0.0961 | 61147 | 0.0874 | 59168 | 0.3561 | 1979 |
| Kidney Cortex                             | 0.0039 | 33484277 | 0.1064 | 49300 | 0.1037 | 47733 | 0.1860 | 1567 |
| Liver                                     | 0.0051 | 38860581 | 0.1210 | 58803 | 0.1163 | 56962 | 0.2663 | 1841 |
| Lung                                      | 0.0031 | 46342757 | 0.1173 | 69343 | 0.1127 | 67168 | 0.2598 | 2175 |
| Minor Salivary<br>Gland                   | 0.0048 | 42192031 | 0.1140 | 63014 | 0.1087 | 61039 | 0.2784 | 1975 |
| Muscle Skeletal                           | 0.0034 | 41571704 | 0.1147 | 62287 | 0.1092 | 60284 | 0.2792 | 2003 |
| Nerve Tibial                              | 0.0055 | 47830487 | 0.1102 | 70807 | 0.1030 | 68561 | 0.3301 | 2246 |
| Ovary                                     | 0.0033 | 41915015 | 0.0972 | 62893 | 0.0914 | 60894 | 0.2737 | 1999 |
| Pancreas                                  | 0.0044 | 42078288 | 0.1127 | 63231 | 0.1049 | 61220 | 0.3500 | 2011 |
| Pituitary                                 | 0.0050 | 44752909 | 0.0916 | 66488 | 0.0854 | 64391 | 0.2833 | 2097 |
| Prostate                                  | 0.0030 | 43999548 | 0.1039 | 65235 | 0.0984 | 63189 | 0.2759 | 2046 |
| Skin Not Sun<br>Exposed<br>Subrapubic     | 0.0038 | 46342210 | 0.0891 | 69890 | 0.0815 | 67687 | 0.3227 | 2203 |
| Skin Sun Exposed<br>Lower Leg             | 0.0041 | 47192423 | 0.1037 | 71122 | 0.0972 | 68903 | 0.3051 | 2219 |
| Small Intestine<br>Terminal Ileum         | 0.0023 | 42745652 | 0.0995 | 63667 | 0.0952 | 61672 | 0.2314 | 1995 |
| Spleen                                    | 0.0033 | 43155273 | 0.1053 | 64743 | 0.0993 | 62727 | 0.2919 | 2016 |
| Stomach                                   | 0.0041 | 43048735 | 0.1069 | 64433 | 0.1000 | 62388 | 0.3163 | 2045 |
| Testis                                    | 0.0035 | 54800000 | 0.0958 | 76465 | 0.0907 | 74134 | 0.2583 | 2331 |
| Thyroid                                   | 0.0037 | 47563494 | 0.1112 | 70680 | 0.1051 | 68446 | 0.3000 | 2234 |
| Uterus                                    | 0.0041 | 40141495 | 0.0998 | 60065 | 0.0959 | 58216 | 0.2241 | 1849 |
| Vagina                                    | 0.0026 | 39167972 | 0.1004 | 58600 | 0.0975 | 56788 | 0.1895 | 1812 |
| Whole Blood                               | 0.0026 | 39095230 | 0.0825 | 61223 | 0.0761 | 59306 | 0.2816 | 1917 |



**Table S4. TOPMed MESA TWAS for protein results for every tissue.**  $\pi_1$  is the expected true positive rate and the number of transcript-protein pairs tested is indicated for each mechanism class.

| Tissue                                | <i>Trans-Acting</i> $\pi_1$ | <i>Pairs tested</i> | <i>Cis-acting</i> $\pi_1$ | <i>Pairs tested</i> | <i>Cis-different</i> $\pi_1$ | <i>Pairs tested</i> | <i>Cis-same</i> $\pi_1$ | <i>Pairs tested</i> |
|---------------------------------------|-----------------------------|---------------------|---------------------------|---------------------|------------------------------|---------------------|-------------------------|---------------------|
| Adipose Subcutaneous                  | 0.3517                      | 1205                | 0.7811                    | 790                 | 0.7418                       | 629                 | 0.9264                  | 161                 |
| Adipose Visceral Omentum              | 0.3265                      | 1261                | 0.7529                    | 784                 | 0.7138                       | 627                 | 0.8893                  | 157                 |
| Adrenal Gland                         | 0.4307                      | 953                 | 0.8616                    | 690                 | 0.8309                       | 546                 | 0.9794                  | 144                 |
| Artery Aorta                          | 0.3410                      | 1097                | 0.7311                    | 769                 | 0.6716                       | 621                 | 0.9786                  | 148                 |
| Artery Coronary                       | 0.2554                      | 882                 | 0.7736                    | 745                 | 0.7555                       | 607                 | 0.8493                  | 138                 |
| Artery Tibial                         | 0.3544                      | 1022                | 0.8095                    | 774                 | 0.7720                       | 627                 | 0.9727                  | 147                 |
| Brain Amygdala                        | 0.4180                      | 764                 | 0.7772                    | 621                 | 0.7607                       | 508                 | 0.8522                  | 113                 |
| Brain Anterior Cingulate Cortex BA24  | 0.4518                      | 854                 | 0.7556                    | 657                 | 0.7179                       | 543                 | 0.9218                  | 114                 |
| Brain Caudate Basal Ganglia           | 0.4476                      | 989                 | 0.8169                    | 712                 | 0.8065                       | 576                 | 0.8575                  | 136                 |
| Brain Cerebellar Hemisphere           | 0.3417                      | 754                 | 0.7715                    | 649                 | 0.7545                       | 531                 | 0.8412                  | 118                 |
| Brain Cerebellum                      | 0.4520                      | 940                 | 0.8446                    | 617                 | 0.8376                       | 508                 | 0.8787                  | 109                 |
| Brain Cortex                          | 0.3934                      | 940                 | 0.7664                    | 692                 | 0.7493                       | 575                 | 0.8585                  | 117                 |
| Brain Frontal Cortex BA9              | 0.3860                      | 920                 | 0.8247                    | 674                 | 0.8037                       | 546                 | 0.9190                  | 128                 |
| Brain Hippocampus                     | 0.4210                      | 885                 | 0.8350                    | 672                 | 0.8267                       | 546                 | 0.8668                  | 126                 |
| Brain Hypothalamus                    | 0.5522                      | 801                 | 0.8129                    | 670                 | 0.8011                       | 552                 | 0.8714                  | 118                 |
| Brain Nucleus Accumbens Basal Ganglia | 0.4337                      | 932                 | 0.8005                    | 674                 | 0.7995                       | 563                 | 0.8059                  | 111                 |
| Brain Putamen Basal Ganglia           | 0.4909                      | 979                 | 0.8254                    | 687                 | 0.7991                       | 552                 | 0.9309                  | 135                 |
| Brain Spinal Cord Cervical C-1        | 0.3899                      | 861                 | 0.8511                    | 627                 | 0.8393                       | 511                 | 0.9059                  | 116                 |
| Brain Substantia Nigra                | 0.3986                      | 760                 | 0.7339                    | 578                 | 0.6943                       | 477                 | 0.9424                  | 101                 |
| Breast Mammary Tissue                 | 0.3469                      | 1129                | 0.7406                    | 722                 | 0.7014                       | 574                 | 0.8935                  | 148                 |
| Cells Cultered Fibroblasts            | 0.2617                      | 995                 | 0.8408                    | 682                 | 0.8322                       | 557                 | 0.8793                  | 125                 |
| Cells EBV-Transformed Lymphocytes     | 0.3793                      | 814                 | 0.7590                    | 652                 | 0.7545                       | 547                 | 0.7824                  | 105                 |
| Colon Sigmoid                         | 0.3949                      | 1122                | 0.7361                    | 733                 | 0.7297                       | 575                 | 0.7586                  | 158                 |
| Colon Transverse                      | 0.4455                      | 1120                | 0.7872                    | 737                 | 0.7816                       | 598                 | 0.8119                  | 139                 |

|                                           |        |      |        |     |        |     |        |     |
|-------------------------------------------|--------|------|--------|-----|--------|-----|--------|-----|
| Esophagus<br>Gastroesophageal<br>Junction | 0.3673 | 1148 | 0.8216 | 784 | 0.8071 | 626 | 0.8831 | 158 |
| Esophagus Mucosa                          | 0.3807 | 1115 | 0.8939 | 779 | 0.8826 | 636 | 0.9436 | 143 |
| Esophagus<br>Mucularis                    | 0.3357 | 1137 | 0.8678 | 797 | 0.8566 | 628 | 0.9063 | 169 |
| Heart Atrial<br>Appendage                 | 0.3969 | 1274 | 0.8026 | 797 | 0.7969 | 642 | 0.8235 | 155 |
| Heart Left<br>Ventricle                   | 0.4327 | 881  | 0.7376 | 685 | 0.7459 | 534 | 0.7082 | 151 |
| Kidney Cortex                             | 0.3874 | 778  | 0.8443 | 564 | 0.8251 | 454 | 0.9237 | 110 |
| Liver                                     | 0.4455 | 1023 | 0.7877 | 732 | 0.7741 | 588 | 0.8401 | 144 |
| Lung                                      | 0.3502 | 1240 | 0.7596 | 804 | 0.7305 | 646 | 0.8757 | 158 |
| Minor Salivary<br>Gland                   | 0.3688 | 938  | 0.8299 | 773 | 0.8237 | 646 | 0.8622 | 127 |
| Muscle Skeletal                           | 0.4151 | 828  | 0.8153 | 670 | 0.7949 | 531 | 0.8896 | 139 |
| Nerve Tibial                              | 0.3771 | 1248 | 0.7853 | 810 | 0.7520 | 664 | 0.9333 | 146 |
| Ovary                                     | 0.3564 | 814  | 0.7627 | 739 | 0.7462 | 605 | 0.8350 | 134 |
| Pancreas                                  | 0.4871 | 1171 | 0.8268 | 727 | 0.8238 | 596 | 0.8408 | 131 |
| Pituitary                                 | 0.3628 | 1047 | 0.7373 | 755 | 0.7033 | 610 | 0.8881 | 145 |
| Prostate                                  | 0.3753 | 988  | 0.8194 | 722 | 0.7918 | 585 | 0.9448 | 137 |
| Skin Not Sun<br>Exposed<br>Subrapubic     | 0.3136 | 1209 | 0.8065 | 811 | 0.7784 | 663 | 0.9332 | 148 |
| Skin Sun Exposed<br>Lower Leg             | 0.3816 | 1217 | 0.8387 | 813 | 0.8243 | 655 | 0.9001 | 158 |
| Small Intestine<br>Terminal Ileum         | 0.4412 | 924  | 0.8430 | 681 | 0.8232 | 547 | 0.9246 | 134 |
| Spleen                                    | 0.3356 | 1217 | 0.8058 | 724 | 0.7800 | 575 | 0.9175 | 149 |
| Stomach                                   | 0.4160 | 1018 | 0.7056 | 790 | 0.7101 | 640 | 0.6843 | 150 |
| Testis                                    | 0.4175 | 1056 | 0.7689 | 838 | 0.7241 | 690 | 0.9738 | 148 |
| Thyroid                                   | 0.3648 | 1231 | 0.8217 | 809 | 0.8147 | 658 | 0.8516 | 151 |
| Uterus                                    | 0.3957 | 852  | 0.8009 | 624 | 0.7831 | 511 | 0.8815 | 113 |
| Vagina                                    | 0.4698 | 900  | 0.8451 | 641 | 0.8246 | 538 | 0.9504 | 103 |
| Whole Blood                               | 0.4168 | 1199 | 0.9013 | 760 | 0.8902 | 607 | 0.9443 | 153 |

**Table S5. *Trans*-targets are enriched for transcription factor binding motifs.**

| Transcription Factor Gene | MSigDB Accession  | # of Targets in Gene Set | # of Sig. Targets in Gene Set | Significant Target Genes                                                                                                                                                                  | P-value | Adjusted P-value |
|---------------------------|-------------------|--------------------------|-------------------------------|-------------------------------------------------------------------------------------------------------------------------------------------------------------------------------------------|---------|------------------|
| <i>NFKB</i>               | NFKB_C            | 66                       | 16                            | <i>VCAMI, TNFSF18, BDNF, PTHLH, IL23A, CDH5, ICAMI, IL27RA, SIRT2, SNAP25, BCL2L1, IL2, TSLP, IRF1, TNFSF15, PAPP</i>                                                                     | 2.6e-4  | 3.04e-2          |
| <i>NFKB</i>               | NFKB_Q6           | 54                       | 16                            | <i>VCAMI, TNFSF18, BDNF, STIP1, CADM1, PTHLH, IL23A, GREM1, MED1, RNF43, ICAMI, TSLP, TNFSF15, PAPP</i>                                                                                   | 2.99e-4 | 3.04e-2          |
| <i>NFKB</i>               | NFKB_Q6_01        | 61                       | 19                            | <i>VCAMI, TNFSF18, BDNF, CADM1, PTHLH, IL23A, GREM1, TP53, RNF43, EB13, ICAMI, IL27RA, SIRT2, SNAP25, MMP9, IL6ST, TSLP, TNFSF15, PAPP</i>                                                | 1.25e-6 | 5.43e-4          |
| <i>RELA</i>               | NFKAPPA_B_01      | 61                       | 16                            | <i>VCAMI, TNFSF18, BDNF, IL23A, GREM1, CXCL16, TP53, MED1, LAMA1, EB13, ICAMI, IL27RA, MMP9, TSLP, IRF1, TNFSF15</i>                                                                      | 9.51e-5 | 1.93e-2          |
| <i>RELA</i>               | NFKAPPA_B65_01    | 52                       | 14                            | <i>TNFSF18, BDNF, PTHLH, GREM1, CXCL16, TP53, RNF43, LAMA1, ICAMI, SIRT2, MMP9, IL6ST, TSLP, TNFSF15</i>                                                                                  | 1.94e-4 | 2.95e-2          |
| <i>NFAT1C</i>             | TGGAAA_NFAT_Q4_01 | 351                      | 59                            | <i>ISG15, TNFRSF8, BCAR3, TSHB, NTRK1, FASLG, FGF8, ADM, BDNF, FTH1, STIP1, CADM1, ERBB3, IL23A, IGF1, TNFSF11, IL25, GREM1, SPINT1, CDH5, TP53, MAP2K3, RNF43, COLEC12, RETN, ICAMI,</i> | 1.78e-6 | 5.43e-4          |

|              |           |    |    |                                                                                                                                                                                                                                                |         |         |
|--------------|-----------|----|----|------------------------------------------------------------------------------------------------------------------------------------------------------------------------------------------------------------------------------------------------|---------|---------|
|              |           |    |    | <i>POMC, LRP1B, SNAP25, JAG1, JAG1, USP25, PDGFB, CHL1, LTF, LSAMP, FSTL1, APOD, PDGFRA, IBSP, IL2, CCL28, IL6ST, PDE4D, CAST, SEMA6A, IL5, IL12B, APOM, EHMT2, IL17F, SYNCRIP, SMPDL3A, INHBA, HGF, SEMA3A, ANGPT1, TNFRSF11B, TPM2, PAK3</i> |         |         |
| <i>FOXF2</i> | FREAC2_01 | 44 | 12 | <i>TXNDC12, BDNF, CADMI, IGF1, IL25, GREM1, AKT2, IL6ST, CD109, CGA, INHBA, PAPP A</i>                                                                                                                                                         | 4.9e-4  | 3.4e-2  |
| <i>AR</i>    | AR_Q2     | 17 | 7  | <i>BDNF, MSTN, SNAP25, AGER, SYNCRIP, INHBA, CD36</i>                                                                                                                                                                                          | 5.02e-4 | 3.4e-2  |
| <i>GATA1</i> | GATA1_04  | 51 | 13 | <i>TSHB, ADM, IGF1, IL34, CEBPB, PDGFRA, CAST, IL5, EPO, MSR1, PRSS3, CCL27, PAPP A</i>                                                                                                                                                        | 5.87e-4 | 3.40e-2 |
| <i>STAT1</i> | STAT_01   | 55 | 14 | <i>BDNF, TNFSF11, GZMB, MAP2K3, VTN, LPO, ICAMI, USP25, OSM, THPO, IL6ST, RASAI, IRF1, EHMT2</i>                                                                                                                                               | 3.68e-4 | 3.21e-2 |

**Table S6. *Cis*- and *Trans*-targets are enriched for mapped GWAS catalog associations (FDR < 0.05).**

| Mechanism            | Gene Set                      | # of Targets in Gene Set | # of Significant Targets in Gene Set | P-value   | Adjusted P-value |
|----------------------|-------------------------------|--------------------------|--------------------------------------|-----------|------------------|
| <i>Trans</i> -acting | Blood Protein Levels          | 862                      | 122                                  | 2.26e-8   | 4.10e-5          |
| <i>Trans</i> -acting | Inflammatory Bowel Disease    | 190                      | 38                                   | 2.64e-6   | 2.39e-3          |
| <i>Cis</i> -acting   | Blood Protein Levels          | 862                      | 229                                  | 4.73e-125 | 8.58e-122        |
| <i>Cis</i> -acting   | Ankylosing Spondylitis        | 22                       | 11                                   | 1.89e-7   | 1.62e-4          |
| <i>Cis</i> -acting   | Inflammatory Bowel Disease    | 190                      | 36                                   | 2.68e-7   | 1.62e-4          |
| <i>Cis</i> -acting   | Chronic Inflammatory Diseases | 48                       | 13                                   | 5.21e-5   | 2.36e-2          |

**Table S7. Pleiotropic regulatory loci discovered in INTERVAL.**

| Locus | Genes in Locus                                                                                                                                                               | Chromosome | Location (bp)                | Unique Targets | Replicated Targets (significant / tested) |
|-------|------------------------------------------------------------------------------------------------------------------------------------------------------------------------------|------------|------------------------------|----------------|-------------------------------------------|
| 1     | <i>CFHR3</i> , <i>CFHR1</i> ,<br><i>CFHR4</i>                                                                                                                                | 1          | 196,774,813 –<br>196,888,014 | 134            | 5/56                                      |
| 2     | <i>BCHE</i>                                                                                                                                                                  | 3          | 165,772,904                  | 56             | 3/12                                      |
| 3     | <i>C7</i>                                                                                                                                                                    | 5          | 40,909,497                   | 280            | 51/103                                    |
| 4     | <i>C6</i>                                                                                                                                                                    | 5          | 41,142,116                   | 81             | 9/42                                      |
| 5     | <i>HLA-DQB2</i> ,<br><i>HLA-DQA1</i>                                                                                                                                         | 6          | 32,628,179 –<br>32,756,098   | 82             | 10/31                                     |
| 6     | <i>SKIV2L</i> , <i>CYP21A2</i> ,<br><i>C4B</i>                                                                                                                               | 6          | 31,959,117 –<br>32,038,327   | 86             | 18/34                                     |
| 7     | <i>GSDMD</i>                                                                                                                                                                 | 8          | 143,553,207                  | 54             | 2/20                                      |
| 8     | <i>ABO</i>                                                                                                                                                                   | 9          | 133,233,278                  | 55             | 27/33                                     |
| 9     | <i>SARM1</i> , <i>TMEM199</i> ,<br><i>POLDIP2</i> , <i>SUPT6H</i> ,<br><i>TNFAIP1</i> , <i>TMEM97</i> ,<br><i>IFT20</i> , <i>SLC46A1</i> ,<br><i>ERVE-1</i> , <i>SLC13A2</i> | 17         | 28,232,590 –<br>28,662,198   | 290            | 37/86                                     |
| 10    | <i>MYADM</i> , <i>NLRP12</i> ,<br><i>AC008753.3</i>                                                                                                                          | 19         | 53,787,597 –<br>53,864,763   | 555            | 1/218                                     |
| 11    | <i>APOE</i>                                                                                                                                                                  | 19         | 44,905,791                   | 78             | 1/17                                      |

**Table S8. Pleiotropic regulatory genes are enriched for mapped GWAS catalog associations (FDR < 0.05).**

| Locus | Genes in Locus                                                                           | Associated GWAS Catalog Traits                                                                                                                                                                                                                                                                                                                                                                                                                                                                                                                                                                                                                                                                                                                                                                                                                                                                                                                                                                                                                                                                                                                                                                                                                                                                                                                                                                              |
|-------|------------------------------------------------------------------------------------------|-------------------------------------------------------------------------------------------------------------------------------------------------------------------------------------------------------------------------------------------------------------------------------------------------------------------------------------------------------------------------------------------------------------------------------------------------------------------------------------------------------------------------------------------------------------------------------------------------------------------------------------------------------------------------------------------------------------------------------------------------------------------------------------------------------------------------------------------------------------------------------------------------------------------------------------------------------------------------------------------------------------------------------------------------------------------------------------------------------------------------------------------------------------------------------------------------------------------------------------------------------------------------------------------------------------------------------------------------------------------------------------------------------------|
| 1     | <i>CFHR3, CFHR1, CFHR4</i>                                                               | Nephropathy, Age-related macular degeneration, Matrix metalloproteinase-8 levels, Complement C3 and C4 levels, IgA nephropathy, Advanced age-related macular degeneration                                                                                                                                                                                                                                                                                                                                                                                                                                                                                                                                                                                                                                                                                                                                                                                                                                                                                                                                                                                                                                                                                                                                                                                                                                   |
| 5     | <i>HLA-DQB2, HLA-DQA1</i>                                                                | Immunoglobulin A vasculitis, Strep throat, Childhood steroid-sensitive nephrotic syndrome, Neuromyelitis optica, Pneumonia, Neuromyelitis optica (AQP4-IgG-positive), Chronic hepatitis C infection, Drug-induced liver injury (flucloxacillin), Plantar warts, Shingles, Myositis, Multiple sclerosis (OCB status), Late-onset myasthenia gravis, Lymphoma, PEG-asparaginase hypersensitivity without enzyme activity in childhood acute lymphoblastic leukemia, Peanut allergy, Response to hepatitis B vaccine, Nephropathy, Cervical cancer, Asthma (moderate or severe), Sarcoidosis (non-Lofgren's syndrome without extrapulmonary manifestations), IgA nephropathy, Allergy, Self-reported allergy, Allergic sensitization, Childhood ear infection, Sjögren's syndrome, Primary biliary cirrhosis, Tuberculosis, Systemic sclerosis, Tonsillectomy, Hypothyroidism, Takayasu arteritis, Chronic lymphocytic leukemia, Squamous cell lung carcinoma, Allergic rhinitis, Itch intensity from mosquito bite adjusted by bite size, Celiac disease, Asthma or allergic disease (pleiotropy), Lung cancer, Rheumatoid arthritis, Red blood cell count, Allergic disease (asthma, hay fever or eczema), Asthma, Prostate cancer, Systemic lupus erythematosus, Ulcerative colitis, Type 2 diabetes, Autism spectrum disorder or schizophrenia, Crohn's disease, Schizophrenia, Inflammatory bowel disease |
| 6     | <i>SKIV2L, CYP21A2, C4B</i>                                                              | Prostate cancer, Ulcerative colitis, Autism spectrum disorder or Schizophrenia, Inflammatory bowel disease                                                                                                                                                                                                                                                                                                                                                                                                                                                                                                                                                                                                                                                                                                                                                                                                                                                                                                                                                                                                                                                                                                                                                                                                                                                                                                  |
| 9     | <i>SARM1, TMEM199, POLDIP2, SUPT6H, TNFAIP1, TMEM97, IFT20, SLC46A1, ERVE-1, SLC13A2</i> | Osteoprotegerin levels, Blood protein levels                                                                                                                                                                                                                                                                                                                                                                                                                                                                                                                                                                                                                                                                                                                                                                                                                                                                                                                                                                                                                                                                                                                                                                                                                                                                                                                                                                |
| 10    | <i>MYADM, NLRP12, AC008753.3</i>                                                         | None                                                                                                                                                                                                                                                                                                                                                                                                                                                                                                                                                                                                                                                                                                                                                                                                                                                                                                                                                                                                                                                                                                                                                                                                                                                                                                                                                                                                        |

Table S9. TOPMed MESA *cis*-same  $\pi_1$  values for every predicted and observed tissue.

| Tissue                               | <i>Cis</i> -same $\pi_1$ | # Transcript-protein pairs tested |
|--------------------------------------|--------------------------|-----------------------------------|
| Brain Putamen basal ganglia          | 0.4912                   | 767                               |
| Skin Sun Exposed Lower leg           | 0.4662                   | 898                               |
| Small Intestine Terminal Ileum       | 0.4610                   | 821                               |
| Kidney Cortex                        | 0.4480                   | 627                               |
| Esophagus Muscularis                 | 0.4473                   | 892                               |
| Uterus                               | 0.4406                   | 740                               |
| Liver                                | 0.4317                   | 774                               |
| Cells Cultured fibroblasts           | 0.4195                   | 827                               |
| Adrenal Gland                        | 0.4193                   | 789                               |
| Minor Salivary Gland                 | 0.4040                   | 817                               |
| Esophagus Mucosa                     | 0.3960                   | 899                               |
| Testis                               | 0.3945                   | 953                               |
| Muscle Skeletal                      | 0.3910                   | 798                               |
| Brain Caudate basal ganglia          | 0.3896                   | 789                               |
| Heart Atrial Appendage               | 0.3850                   | 859                               |
| Pituitary                            | 0.3845                   | 847                               |
| Brain Hypothalamus                   | 0.3726                   | 774                               |
| Colon Transverse                     | 0.3708                   | 863                               |
| Thyroid                              | 0.3651                   | 892                               |
| Brain Frontal Cortex BA9             | 0.3633                   | 791                               |
| Adipose Subcutaneous                 | 0.3530                   | 866                               |
| Brain Spinal cord cervical c-1       | 0.3472                   | 748                               |
| Ovary                                | 0.3440                   | 820                               |
| Adipose Visceral Omentum             | 0.3427                   | 881                               |
| Brain Anterior cingulate cortex BA24 | 0.3408                   | 767                               |
| Heart Left Ventricle                 | 0.3408                   | 822                               |
| Brain Hippocampus                    | 0.3366                   | 758                               |
| Brain Substantia nigra               | 0.3319                   | 720                               |
| <b>Whole Blood</b>                   | <b>0.3311</b>            | 796                               |
| Breast Mammary Tissue                | 0.3239                   | 856                               |
| Prostate                             | 0.3223                   | 826                               |
| Skin Not Sun Exposed Suprapubic      | 0.3222                   | 881                               |
| Artery Aorta                         | 0.3183                   | 872                               |
| Brain Cerebellum                     | 0.3168                   | 780                               |
| Cells EBV-transformed lymphocytes    | 0.3129                   | 727                               |
| Brain Cortex                         | 0.3048                   | 809                               |
| Lung                                 | 0.3031                   | 891                               |



|                                       |        |     |
|---------------------------------------|--------|-----|
| Vagina                                | 0.3028 | 743 |
| Esophagus Gastroesophageal Junction   | 0.2962 | 844 |
| Brain Nucleus accumbens basal ganglia | 0.2905 | 772 |
| Colon Sigmoid                         | 0.2872 | 853 |
| Brain Amygdala                        | 0.2848 | 721 |
| Nerve Tibial                          | 0.2764 | 921 |
| Spleen                                | 0.2747 | 846 |
| Artery Coronary                       | 0.2684 | 828 |
| Artery Tibial                         | 0.2678 | 886 |
| Stomach                               | 0.2662 | 839 |
| Pancreas                              | 0.2418 | 826 |
| PBMC – observed                       | 0.2393 | 862 |
| Monocytes – observed                  | 0.1928 | 862 |
| Brain Cerebellar Hemisphere           | 0.1819 | 794 |
| T-cells – observed                    | 0.0768 | 862 |

## Detailed Acknowledgements

This work is supported by the NIH National Human Genome Research Institute Academic Research Enhancement Award R15 HG009569 (HEW).

Participants in the INTERVAL randomised controlled trial were recruited with the active collaboration of NHS Blood and Transplant England ([www.nhsbt.nhs.uk](http://www.nhsbt.nhs.uk)), which has supported field work and other elements of the trial. DNA extraction and genotyping was co-funded by the National Institute for Health Research (NIHR), the NIHR BioResource (<http://bioresource.nihr.ac.uk>) and the NIHR [Cambridge Biomedical Research Centre at the Cambridge University Hospitals NHS Foundation Trust]. The INTERVAL study was funded by NHSBT (11-01-GEN). The academic coordinating centre for INTERVAL was supported by core funding from: NIHR Blood and Transplant Research Unit in Donor Health and Genomics (NIHR BTRU-2014-10024), UK Medical Research Council (MR/L003120/1), British Heart Foundation (SP/09/002; RG/13/13/30194; RG/18/13/33946) and the NIHR [Cambridge Biomedical Research Centre at the Cambridge University Hospitals NHS Foundation Trust]. Proteomic assays were funded by the academic coordinating centre for INTERVAL and MRL, Merck & Co., Inc. A complete list of the investigators and contributors to the INTERVAL trial is provided in Di Angelantonio et al. The academic coordinating centre would like to thank blood donor centre staff and blood donors for participating in the INTERVAL trial. This work was supported by Health Data Research UK, which is funded by the UK Medical Research Council, Engineering and Physical Sciences Research Council, Economic and Social Research Council, Department of Health and Social Care (England), Chief Scientist Office of the Scottish Government Health and Social Care Directorates, Health and Social Care Research and Development Division (Welsh Government), Public Health Agency (Northern Ireland), British Heart Foundation and Wellcome. The views expressed are those of the authors and not necessarily those of the NHS, the NIHR or the Department of Health and Social Care. The funders had no role in study design, data collection and analysis, decision to publish, or preparation of the manuscript.

MESA and the MESA SHARe project are conducted and supported by the National Heart, Lung, and Blood Institute (NHLBI) in collaboration with MESA investigators. Support for MESA is provided by contracts 75N92020D00001, HHSN268201500003I, N01-HC-95159, 75N92020D00005, N01-HC-95160, 75N92020D00002, N01-HC-95161, 75N92020D00003, N01-HC-95162, 75N92020D00006, N01-HC-95163, 75N92020D00004, N01-HC-95164, 75N92020D00007, N01-HC-95165, N01-HC-95166, N01-HC-95167, N01-HC-95168, N01-HC-95169, UL1-TR-000040, UL1-TR-001079, UL1-TR-001420. Funding for SHARe genotyping was provided by NHLBI Contract N02-HL-64278. Genotyping was performed at Affymetrix (Santa Clara, California, USA) and the Broad Institute of Harvard and MIT (Boston, Massachusetts, USA) using the Affymetrix Genome-Wide Human SNP Array 6.0. MESA Family is conducted and supported by the National Heart, Lung, and Blood Institute (NHLBI) in collaboration with MESA investigators. Support is provided by grants and contracts R01HL071051, R01HL071205, R01HL071250, R01HL071251, R01HL071258, R01HL071259, by the National Center for Research Resources, Grant UL1RR033176. Also supported in part by the National Center for Advancing Translational Sciences, CTSI grant UL1TR001881, and the National Institute of Diabetes and Digestive and Kidney Disease Diabetes Research Center (DRC) grant DK063491 to the Southern California Diabetes Endocrinology Research Center.

The TOPMed MESA Multi-Omics project was conducted by the University of Washington and LABioMed (HHSN268201500003I/HHSN26800004). Molecular data for the

Trans-Omics in Precision Medicine (TOPMed) program was supported by the National Heart, Lung and Blood Institute (NHLBI). SOMAscan proteomics for NHLBI TOPMed: Multi-Ethnic Study of Atherosclerosis (MESA) (phs001416.v1.p1) was performed at the Broad Institute and Beth Israel Proteomics Platform (HHSN268201600034I). Core support including centralized genomic read mapping and genotype calling, along with variant quality metrics and filtering were provided by the TOPMed Informatics Research Center (3R01HL-117626-02S1; contract HHSN268201800002I). Core support including phenotype harmonization, data management, sample-identity QC, and general program coordination were provided by the TOPMed Data Coordinating Center (R01HL-120393; U01HL-120393; contract HHSN268201800001I). The MESA Epigenomics and Transcriptomics Studies were funded by National Institutes of Health grants 1R01HL101250, 1RF1AG054474, R01HL126477, R01DK101921, and R01HL135009. Support for analysis of the TOPMed MESA Multi-Omics data was provided by R01HL153248. The authors thank the other investigators, the staff, and the participants of the MESA study for their valuable contributions. A full list of participating MESA investigators and institutes can be found at <http://www.mesa-nhlbi.org>.
